# Supplementary material for: Biliverdin Reductase inhibitors did not improve severe unconjugated hyperbilirubinemia in vivo
Source: PubMed Central journal article supplement (PMC5431759; doi:10.1038/s41598-017-01602-w), 2017-05-10
Supplement: 41598_2017_1602_MOESM1_ESM.pdf [file 41598_2017_1602_MOESM1_ESM.pdf]

## **Biliverdin Reductase inhibitors did not improve severe unconjugated hyperbilirubinemia *in vivo***

Remco van Dijk<sup>1\*</sup>, Sem J. Aronson<sup>1\*</sup>, Dirk R. de Waart<sup>1</sup>, Stan F van de Graaf<sup>1</sup>, Suzanne Duijst<sup>1</sup>, Jurgen Seppen<sup>1</sup>, Ronald Oude Elferink<sup>1</sup>, Ulrich Beuers<sup>1</sup> and Piter J. Bosma<sup>1</sup>

<sup>1</sup> Tytgat Institute for Liver and Intestinal Research & Department of Gastroenterology and Hepatology, University of Amsterdam, the Netherlands.

**Author Contributions statement:** \* RD and SA have contributed equally to this manuscript: collecting data, performing analysis and writing manuscript. PB initiated project. RdW and SD collected data. SvdG, JS, ROE, UB and PB critically revised the manuscript. All authors approve manuscript.

### **Address for correspondence:**

Dr. Piter J. Bosma

Department of Gastroenterology and Hepatology

Tytgat Institute for Liver and Intestinal Research

Academic Medical Center, S1-1768

University of Amsterdam

Meibergdreef 69

1105 BK Amsterdam

The Netherlands

Tel.: +31-20-566-8850

Fax: +31-20-566-9190

E-mail: p.j.bosma@amc.uva.nl

**Keywords:** Biliverdin Reductase; BVRA; Crigler-Najjar; Disulfiram; Montelukast; Ugt1a1-deficient rats; Unconjugated Hyperbilirubinemia

**Competing financial interests statement:** None of the authors have any conflicts of financial interest to disclose with regard to this work.

## Supplementary figures

| Gene (exon) | Primer sequence |                        | Length bp |
|-------------|-----------------|------------------------|-----------|
| Rat BLVRA   | F               | TCTGTCTGTCTTCGGACACT   | 977       |
|             | R               | TGGTTGATAGGACCAAACCCTG |           |
| Human BLVRA | F               | CGTCAGTGACCGAAGGAA     | 959       |
|             | R               | ATGCTGGTGCCATCTTGGA    |           |

**Supplementary table 1: Primer sequences used for the cloning of rat and human biliverdin reductase A (rBVRA, hBVRA)**

**a**

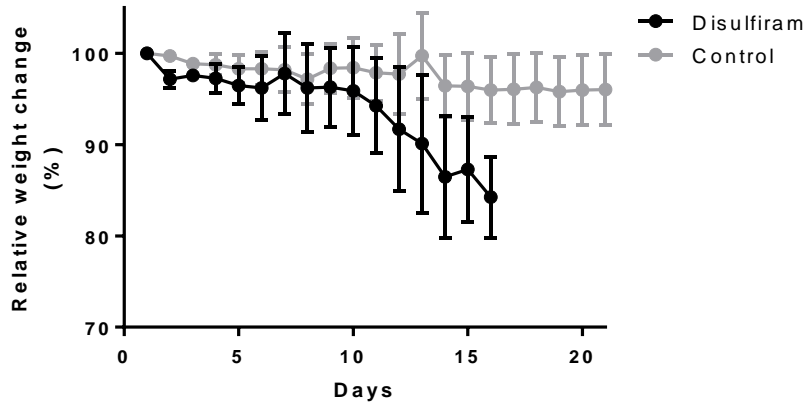

**b**

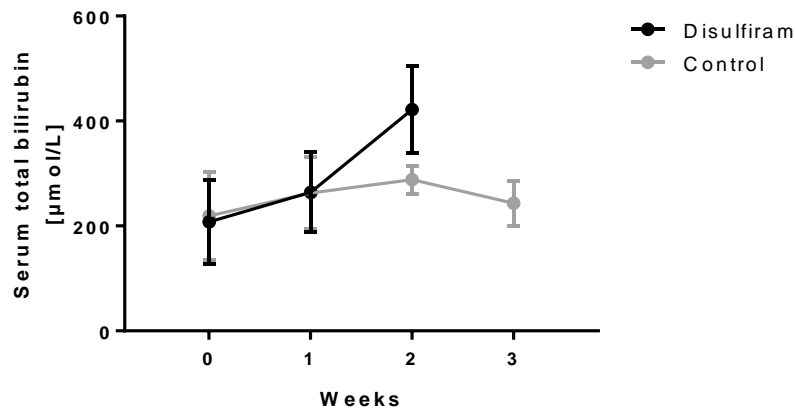

**c**

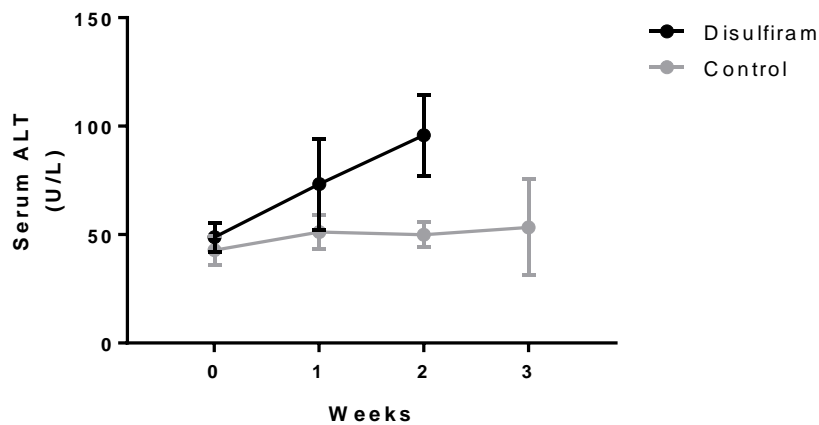

**Supplementary figure 1: Hepatotoxic effect of Disulfiram in adult Gunn rats after 2 weeks of oral administration (90-180mg/kg/day) resulted in (a) weight loss compared to the control group (b)**

increase in serum total bilirubin ( $\mu\text{mol/L}$ ) and (c) elevation of alanine aminotransferase (ALT), leading to termination of the experiment. Data represent the mean  $\pm$  SD of five animals per group.

**a**

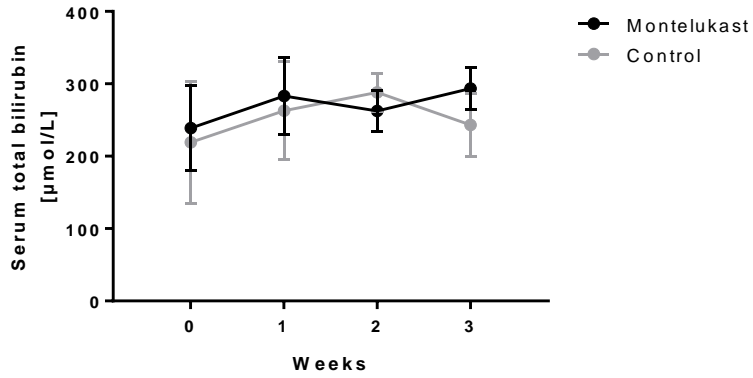

**b**

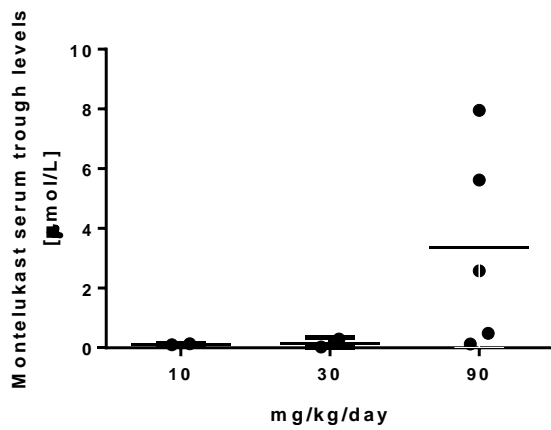

**c**

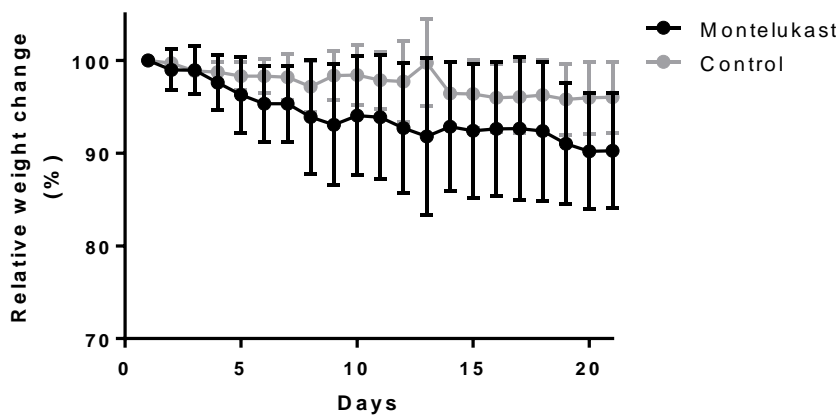

d

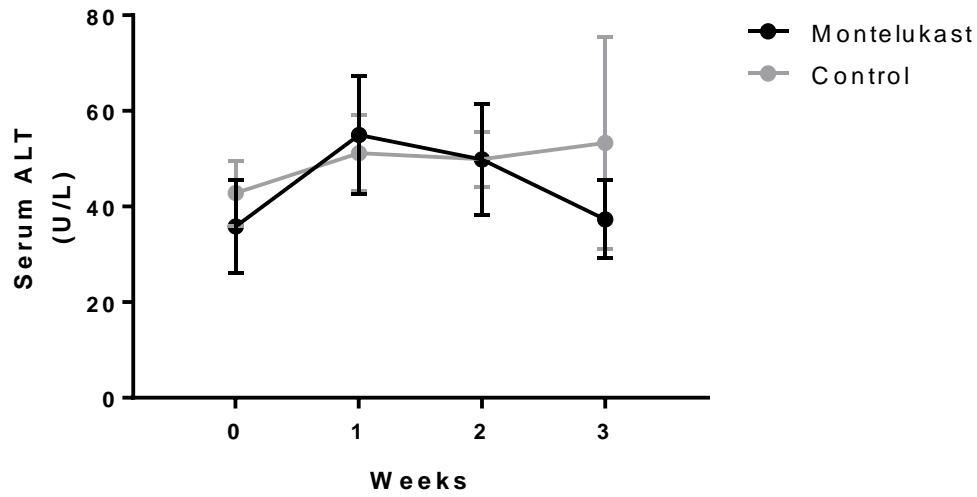

**Supplementary figure 2: Oral administration of Montelukast (up to 90 mg/kg/day)** does (a) not result in reduction of serum total bilirubin, due to (b) insufficient serum concentrations to achieve complete BVRA inhibition (>60  $\mu\text{mol/L}$ ). (c) no significant weight loss compared to control or (d) elevation of alanine aminotransferase (ALT) were seen in these animals. Data represent the mean  $\pm$  SD of five animals per group.
